# Supplementary material for: Effects of anthocyanins on β-lactoglobulin glycoxidation: a study of mechanisms and structure–activity relationship
Source: Royal Society of Chemistry journal article supplement (doi:10.1039/d1fo01665b), 2021-01-01
Supplement: d1fo01665b1.pdf [file d1fo01665b1.pdf]

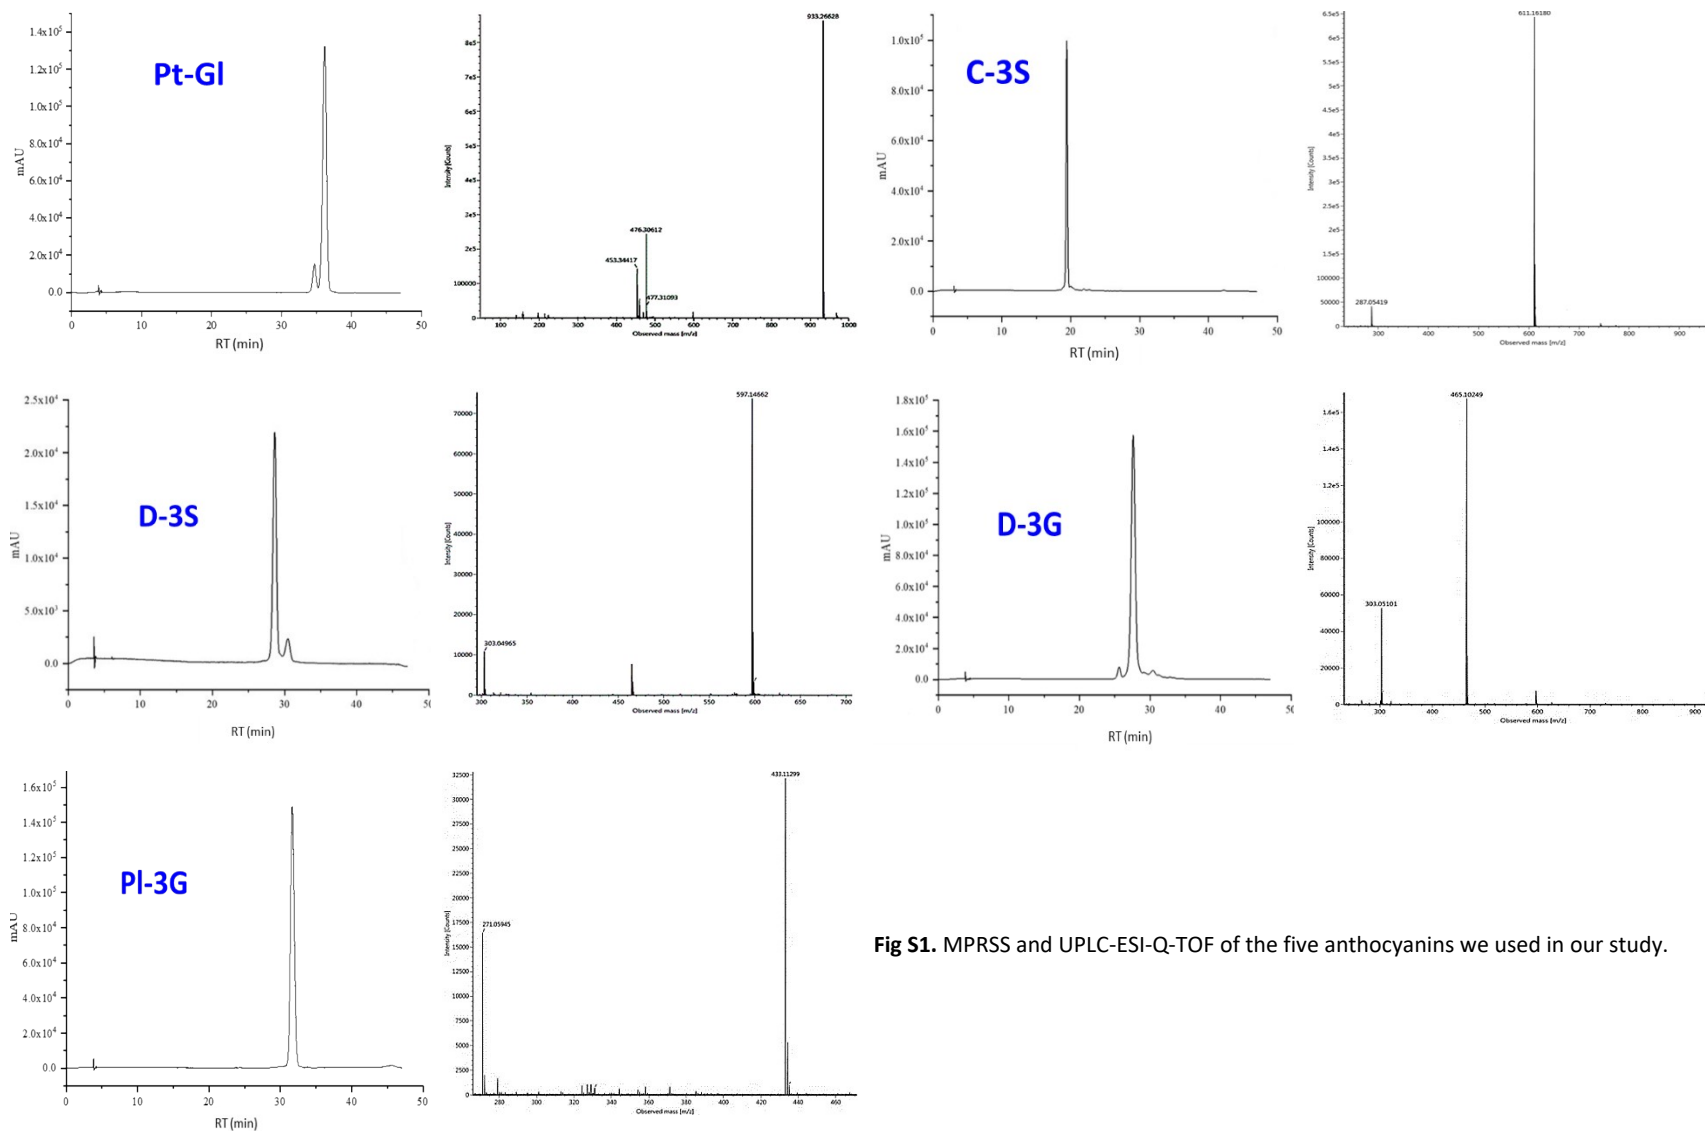

Fig S1. MPRSS and UPLC-ESI-Q-TOF of the five anthocyanins we used in our study.

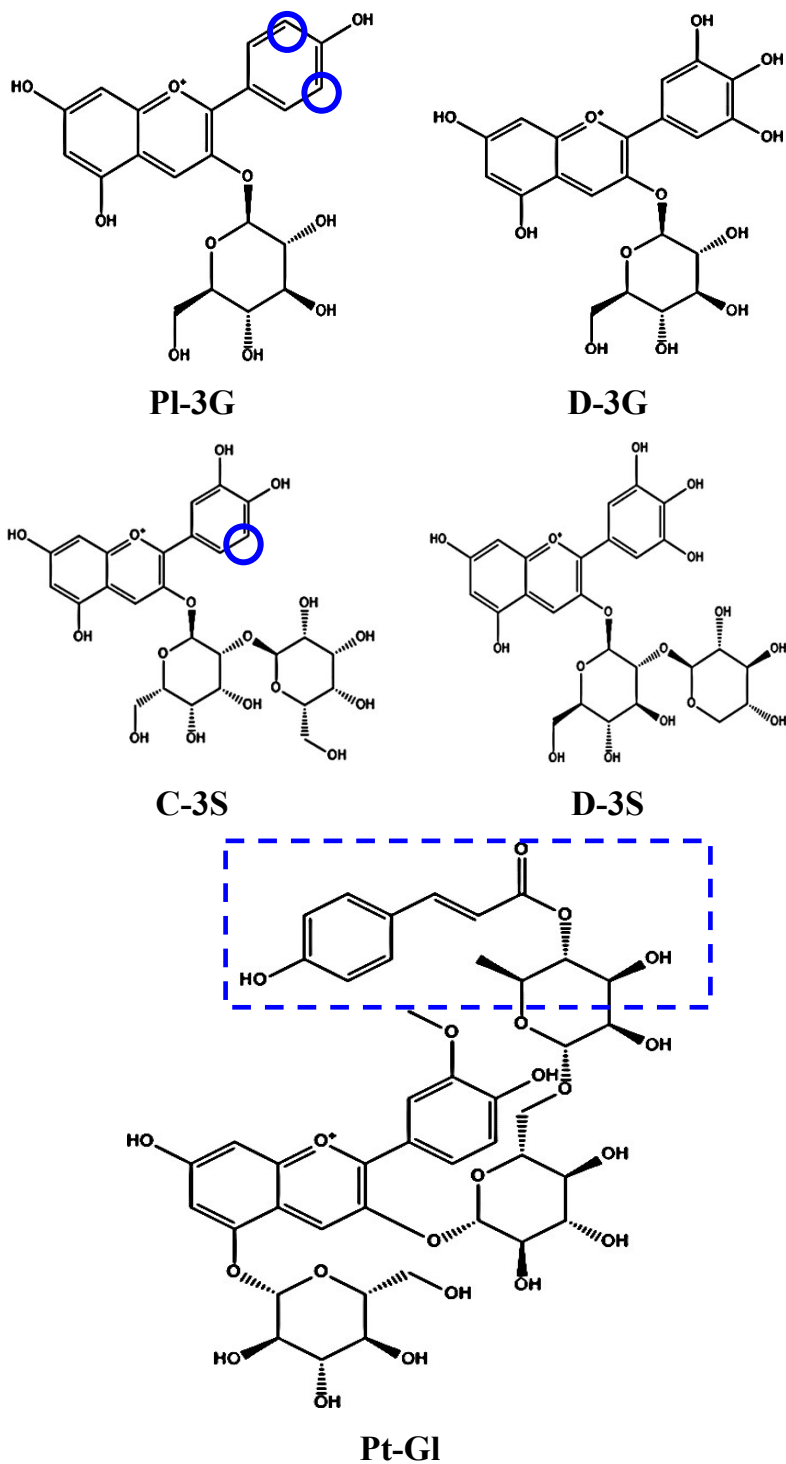

**Figure S2.** The structure for the five anthocyanins. The first row represents the structure for mono-glucoside, the second row represents the structure of di-glycoside, and the third row represent the poly-glycoside anthocyanins.



**Table S1.** Molecular interaction of different anthocyanins active sties with  $\beta$ -Lg-subunits.

| <b>Mixtures</b>                    | <b>Binding energy (Kcal mol<sup>-1</sup>)</b> | <b>H-bonds</b>                                 | <b>Van der Waals bonds</b> | <b>Hydrophobic bonds</b>                                                              | <b>Others</b>                                                                                                        | <b>ANs-involved groups</b>                                               |                                                                |
|------------------------------------|-----------------------------------------------|------------------------------------------------|----------------------------|---------------------------------------------------------------------------------------|----------------------------------------------------------------------------------------------------------------------|--------------------------------------------------------------------------|----------------------------------------------------------------|
| <b>D-3G-<math>\beta</math>-Lg</b>  | 5.60                                          | Ser116, Lys69.                                 | --                         | Pro38, Leu39, Asn109, Glu108, Ile56, Asn90.                                           | Leu31, Ala118, Leu117, Lys91, Ser116, Ala118, Asn109, Ile84, Asp85, Ala86, Asn88, Leu87, Val41, Ile71, Leu58, Lys60. | Pi-Anion: Met107.<br>Pi-Alkyl: Val41, Lys60, Ile71, Val92, Ile84.        | C4'-OH-B ring, C and B rings, and glycosyl units.              |
| <b>C-3S-<math>\beta</math>-Lg</b>  | 5.22                                          | Lys69, Pro38, Asn90.                           | --                         | Leu31, Leu117, Glu108, Ile84, Asp85, Ala86, Asn88, Leu87, Val41, Ile71, Leu58, Lys60. | Ser116, Ala118, Asn109, Leu39, Pro38.                                                                                | Pi-Pi<br>Stacked: Met107, Leu39, Pro38.                                  | A, C, and B-rings, and glycosyl units.                         |
| <b>PI-3G-<math>\beta</math>-Lg</b> | 2.55                                          | Ser116, Lys69.                                 | Glu108                     | Leu31, Asn109, Leu117, Lys91, Ile56, Leu58, Pro8.                                     | Leu39, Ala118, Glu108, Leu58, Leu87, Ser116, Ala118, Asn109, Leu39, Pro38, Leu58, Ile56.                             | Pi-Anion: Met107.<br>Pi-Alkyl: Val41, Lys60, Ile71, Val92, Ile84, Met107 | C4'-OH-B ring, C and B rings, and glycosyl units.              |
| <b>D-3S-<math>\beta</math>-Lg</b>  | 3.24                                          | Lys69, Asp85, Ala118.                          | Lys60, Asn88.              | Ala86, Asn109, Leu117, Glu108, Leu39, Pro38, Leu58, Ile56.                            | Leu87, Ser116, Leu31, Lys91, Asn90, Val41, Ile71, Ile84.                                                             | Pi-Anion: Met107.<br>Pi-Alkyl: Val41, Ile71, Met107, Val92, Ile84.       | C7-OH-A ring, C6-H- A ring, C and B rings, and glycosyl units. |
| <b>Pt-GI-<math>\beta</math>-Lg</b> | 1.58                                          | His161, Tyr20, Glu127, Thr125, Lys101, Arg124. | --                         | Val123, Val128, Cys160, Gln159, Tyr42, Thr18, Pro126, Val43, Ser21.                   | Asp129, Leu166, Glu158, Gln59, Val43, Glu157, Trp19, Tyr20.                                                          | Pi-Anion: Glu44.<br>Pi-Alkyl: Lys100.<br>Pi-Pi<br>Stacked: Tyr20.        | B-ring, glycosyl units, and acylated part.                     |

**Table S2.** Partition coefficient for octanol water mixture (ClogP), molecular weight, number of H-bonds donor or acceptor, volume, and polar surface area for the five different anthocyanins (SYBYL-X 2.0).

| <b>Anthocyanins</b> | <b>CLogP</b> | <b>Molecular weight</b> | <b>Donor count</b> | <b>Acceptor count</b> | <b>Volume</b> | <b>Polar surface area</b> |
|---------------------|--------------|-------------------------|--------------------|-----------------------|---------------|---------------------------|
| <b>PI-3G</b>        | -1.75        | 433.39                  | 7                  | 10                    | 1050.80       | 313.07                    |
| <b>D-3G</b>         | -3.01        | 465.38                  | 9                  | 12                    | 1101.04       | 382.34                    |
| <b>D-3S</b>         | -4.50        | 597.50                  | 11                 | 16                    | 1330.81       | 399.58                    |
| <b>C-3S</b>         | -3.87        | 611.53                  | 11                 | 16                    | 1360.64       | 445.19                    |
| <b>Pt-GI</b>        | -2.66        | 917.84                  | 12                 | 22                    | 2241.70       | 505.43                    |
